# Supplementary material for: Characteristics of transplant athletes competing at national and international transplant games
Source: HighWire-hosted journal article supplement (doi:10.1136/bmjsem-2021-001248), 2022-02-01
Supplement: bmjsem-2021-001248supp002_data_supplement.pdf [file bmjsem-2021-001248supp002_data_supplement.pdf]

## Supplementary Material

Table 1. Medications characteristics within the five most common transplant sub-groups related to percentage of the sub-group populations.

| Medications (One or more)            | All       | Kidney    | Liver     | Heart     | Stem cell | Lung      |
|--------------------------------------|-----------|-----------|-----------|-----------|-----------|-----------|
| Number of transplant recipients      | 220       | 95        | 50        | 35        | 21        | 11        |
| Mean number of medications $\pm$ SD  | 5 $\pm$ 3 | 5 $\pm$ 2 | 4 $\pm$ 3 | 6 $\pm$ 2 | 2 $\pm$ 2 | 8 $\pm$ 4 |
| Immunosuppressants                   | 88%       | 95%       | 94%       | 100%      | 10%       | 91%       |
| Statins                              | 28%       | 22%       | 6%        | 80%       | -         | 27%       |
| Steroids                             | 47%       | 65%       | 26%       | 43%       | -         | 82%       |
| Analgesics                           | 1%        | 3%        | -         | -         | -         | -         |
| Antibiotics / antiviral / antifungal | 20%       | 9%        | 12%       | 23%       | 34%       | 90%       |
| Anti-hypertensives                   | 47%       | 58%       | 28%       | 69%       | 10%       | 36%       |
| Anti-inflammatories                  | 4%        | 1%        | 16%       | -         | -         | -         |
| Antacid inhibitors                   | 20%       | 24%       | 14%       | 23%       | 5%        | 18%       |
| Anti-diabetic                        | 10%       | 9%        | 8%        | 3%        | -         | 63%       |
| Anti-platelets                       | 22%       | 20%       | 26%       | 37%       | 5%        | -         |
| Anti-coagulants                      | 2%        | 1%        | 2%        | 6%        | -         | 9%        |
| Anti-epileptic                       | 1%        | 2%        | -         | -         | -         | -         |
| Anti-depressant / anxiolytics        | 7%        | 4%        | 4%        | 9%        | 14%       | 9%        |
| Anti-retroviral                      | 1%        | -         | 4%        | -         | -         | -         |
| Antihistamine                        | 2%        | -         | 2%        | 3%        | -         | 9%        |
| Antiparkinsonian                     | 0.5%      | 1%        | -         | -         | -         | -         |
| Respiratory medication               | 1%        | 1%        | -         | -         | -         | 9%        |
| Hormone therapy                      | 11%       | 9%        | 6%        | 20%       | 19%       | -         |

---

|                             |     |     |     |     |     |     |
|-----------------------------|-----|-----|-----|-----|-----|-----|
| Retanoid                    | 1%  | 1%  | 2%  | -   | -   | -   |
| Triptants                   | 1%  | -   | 4%  | 3%  | -   | -   |
| Gout treatment              | 8%  | 8%  | 2%  | 20% | -   | 9%  |
| Gastrointestinal medication | 13% | 8%  | 24% | 6%  | 5%  | 27% |
| Diuretics                   | 2%  | -   | 25  | 3%  | -   | -   |
| Prostate cancer medication  | 0.5 | 1%  | -   | -   | -   | -   |
| Vitamin /minerals           | 36% | 33% | 38% | 37% | 10% | 63% |

---
